# Supplementary material
Source: PubMed Central journal article supplement (PMC3190926)
Supplement: supp_M111.253252_jbc.M111.253252-1.pdf [file supp_M111.253252_jbc.M111.253252-1.pdf]

## **Supplemental Data**

### **Supplemental Materials and Methods**

#### **Microarray analysis**

Total RNAs were prepared from control embryos (40-50 embryos injected with 8ng control MO), *mll*-MO1-injected embryos (40-50 embryos injected with 8ng *mll*-MO1) and *mll*-MO2-injected embryos (40-50 embryos injected with 8ng *mll*-MO2) at the 10-somite stage using Trizol reagent (Invitrogen). The microarray was conducted using the commercially available Agilent 4x44 K Zebrafish Microarray Chip.

#### **Apoptosis assay**

The Acridine Orange staining was used for apoptotic cell staining in embryos. Briefly, the embryos were incubated in 0.05mg/ml Acridine Orange (diluted in 1xPBS) for 2 minutes at room temperature, washed twice with 1xPBS, then observed and photographed under a Leica M205 FA inverted fluorescent microscope.

#### **Immunofluorescent staining**

Embryos at 24hpf stage were fixed in 4% paraformaldehyde at 4°C overnight, washed with PBST (phosphatebuffered saline containing 0.1% Triton X-100) extensively, incubated in blocking buffer(PBST, 1%BSA, 5% FBS), and then incubated in primary phospho-histone H3 antibody(Santa Cruz) (1:500) at 4°C overnight. Embryos were then washed and incubated in FITC-conjugated secondary antibody and observed under a fluorescence microscope.

### **Supplemental Figure Legends**

**Supplemental Figure 1.** Alignment of human, mouse and zebrafish *mll*. Zebrafish *mll* (GenBank accession number NM\_001110279) encodes a 4218- amino acid protein with human (GenBank accession number NP\_005924) and mouse (GenBank accession number NP\_001074518.1) orthologs.

**Supplemental Figure 2.** Apoptosis staining and proliferation staining for embryos without morpholino injection or injected with either *mll*-MO1 or *mll*-MO2. A. Apoptosis staining. B. Phospho-H3 staining.

**Supplemental Figure 3.** The pronephric marker *pax2a* and pre-cardiac marker were not obviously affected by *mll*-knockdown; and embryonic hematopoietic markers *scl* and *lmo2* were reduced after *mll*-knockdown at 5-somite stage. A. A1, *pax2a* expression in embryos without morpholino injection; A2, *pax2a* expression in embryos injected with *mll*-MO1; A3, *nkx2.5* expression in embryos without morpholino injection; A4, *nkx2.5* expression in embryos injected with *mll*-MO1. B. *scl* expression was reduced in *mll* morphants (B1, B2); *lmo2* expression was reduced in *mll* morphants (B3, B4).

**Supplemental Figure 4.** The blood vessel development of zebrafish was not seriously affected by *mll*-knockdown. A. The effect of *mll*-knockdown on aorta marker *ephb2a* expression in embryos at 32 hpf stage. B. The effect of *mll*-knockdown on endothelial cell development marked by *flkl*-GFP in embryos at 24-hpf, 36-hpf and 48hpf stages.

**Supplemental Figure 5.** The effect of *mll*-MO2 mediated *mll*-knockdown on hematopoietic makers (*scl*, *gata1*, *pu.1*, *ephb2a*, *runx1*, *c-myb*, *mpo* and *l-plastin*), myogenic marker (*myoD*), pronephric marker (*pax2a*) and precardiac marker (*nkx2.5*).

**Supplemental Figure 6.** A. The genes were not affected by *mll*-knockdown. A1, A2, *cdx4*; A3, A4, *hoxb5a*; A5, A6, *hoxb7a*; A7, A8, *hoxc8*. B. The injection of *hoxb7a*, *hoxb6b* and *hoxb4a* mRNA could not rescue hematopoietic marker *scl* expression in *mll*-MO1 morphants.

**Supplemental Figure 7.** A. *gadd45aa* expression was not altered after either *hoxa9a* knockdown (A2) or *hoxd3a* knockdown (A3). B. The expression of both *hoxa9a* (B1, B2) and *hoxd3a* (B3, B4) were not altered in embryos with ectopic expression of

*gadd45aa.*

**Supplemental Table S1.** Summary of the primer sequences used in cDNA cloning, promoter cloning, probe cloning and PT-PCR.

**Supplemental Table S2.** Summary of microarray analysis data.
