# Supplementary material
Source: PubMed Central journal article supplement (PMC3190926)
Supplement: supp_M111.253252_jbc.M111.253252-3.pdf [file supp_M111.253252_jbc.M111.253252-3.pdf]

**Table S2: Summary of Microarray Analysis (fold change  $\geq 2.0$  in both *mll*-MO1 and *mll*-MO2 injections)**

| Gene ID                        | Up-regulation by MO injection<br>(fold change) |                 |
|--------------------------------|------------------------------------------------|-----------------|
|                                | <i>mll</i> -MO1                                | <i>mll</i> -MO2 |
| Bbc3                           | 4.68                                           | 36.26           |
| Calcoco2                       | 2.28                                           | 3.48            |
| Casp8                          | 4.49                                           | 46.8            |
| Ccng1                          | 4.13                                           | 10.4            |
| Fhit                           | 2.2                                            | 4.74            |
| Fos                            | 5.34                                           | 52.01           |
| Foxo5                          | 2.95                                           | 16.86           |
| Gadd45 $\alpha$ a<br>(Gadd45a) | 6.98                                           | 224.44          |
| Gsg11                          | 3.36                                           | 2.4             |
| Gtpbp11                        | 2.7                                            | 10.93           |
| Immt                           | 2.83                                           | 2.09            |
| Jag1b                          | 2.14                                           | 2.1             |
| Lnx1                           | 6.22                                           | 28.08           |
| Lrn3                           | 2.35                                           | 3.18            |
| Lym1                           | 2.49                                           | 10.2            |
| Mdm2                           | 3.12                                           | 16.78           |
| Mmp2                           | 3.51                                           | 10.04           |
| Moat-C                         | 2.87                                           | 18.13           |
| Parp3                          | 2.51                                           | 7.87            |
| Pdx1                           | 2.06                                           | 2.82            |
| Penk                           | 2.52                                           | 2.73            |
| Phlda3                         | 5.73                                           | 53.46           |
| Rasl11b                        | 2.19                                           | 4.6             |
| Slc4a2a                        | 2.69                                           | 10.71           |
| Sox17                          | 2.5                                            | 2.73            |
| Tp53                           | 2.39                                           | 4.29            |
| Vrk2                           | 2.09                                           | 10.75           |

| Gene ID | Down-regulation by MO injection<br>(fold change) |                 |
|---------|--------------------------------------------------|-----------------|
|         | <i>mll</i> -MO1                                  | <i>mll</i> -MO2 |
| Acox3   | 2.93                                             | 7.72            |
| Atm     | 2.65                                             | 3.63            |
| Caspb   | 2.58                                             | 3.41            |

|          |      |       |
|----------|------|-------|
| Cmn      | 2.44 | 2.56  |
| Crhbp    | 2.57 | 2.45  |
| Eef2L    | 2.98 | 2.39  |
| Eng2b    | 4.37 | 12.45 |
| Evx1     | 2.44 | 2.1   |
| Fgd      | 2.25 | 3.17  |
| Fkbp10   | 2.55 | 2.29  |
| Fli1b    | 3.35 | 3.82  |
| Foxn4    | 3.03 | 2.67  |
| Gata1    | 4.42 | 22.46 |
| Gfap     | 4.94 | 27.59 |
| Gfi1.1   | 2.6  | 4.7   |
| Hmx1     | 2.4  | 3.12  |
| Hmx4     | 3.62 | 3.28  |
| Hoxa10b  | 2.1  | 2.23  |
| Hoxa13b  | 2.12 | 2.43  |
| Hoxa2b   | 2.05 | 4.11  |
| Hoxd3a   | 2.25 | 2.63  |
| Igfbp1b  | 3.54 | 2.92  |
| Insm1b   | 2.31 | 2.1   |
| Kcnip1b  | 2.42 | 3.4   |
| Kdr1     | 2.33 | 2.31  |
| Khdrbs1  | 2.46 | 2.08  |
| Klhl31   | 2.7  | 2.03  |
| Krml2    | 2.23 | 2.72  |
| Lbx1a    | 2.8  | 4.35  |
| Lmo2     | 2.14 | 2.04  |
| Neurod   | 2.77 | 3.03  |
| Neurod4  | 2.57 | 3.38  |
| Nkx2.3   | 2.62 | 2.44  |
| Ntnlb    | 2.47 | 4.6   |
| Oxct1a   | 2.49 | 2     |
| Pcdhlg18 | 2.14 | 3.12  |
| Plpla    | 2.31 | 8.68  |
| Pou1     | 2.32 | 6.36  |
| Pou12    | 2.27 | 14.53 |
| Rhcg     | 3.08 | 2.86  |
| Rx2      | 2.79 | 10.62 |
| Sox1b    | 2.9  | 5.68  |
| Sst1     | 3.11 | 4.2   |
| Stmn1b   | 5.4  | 6.79  |
| Wnt16    | 2.62 | 5.1   |
